# Supplementary material for: Cirsiliol Suppressed Epithelial to Mesenchymal Transition in B16F10 Malignant Melanoma Cells through Alteration of the PI3K/Akt/NF-κB Signaling Pathway
Source: MDPI journal article supplement (doi:10.3390/ijms20030608), 2019-01-31
Supplement: s1 [file s1]

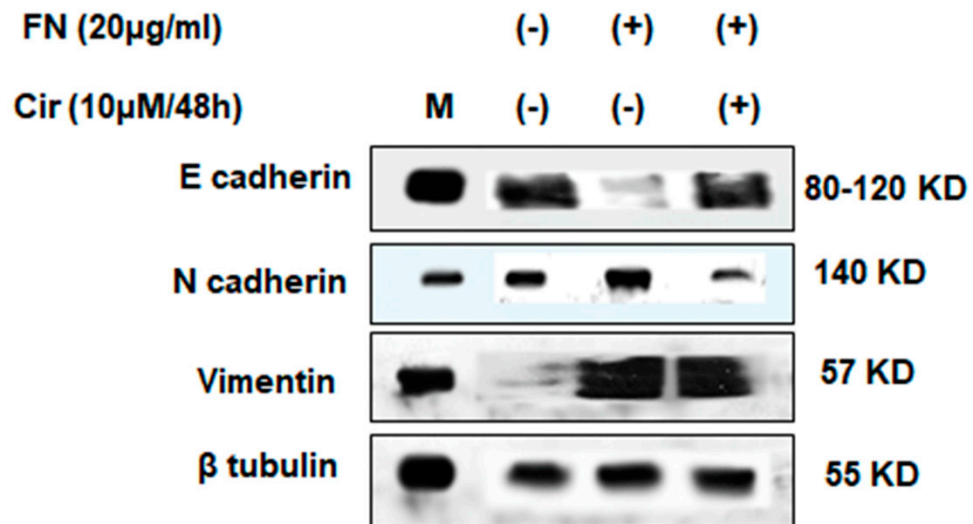

Figure S1. Scanned blots of Figure 4.

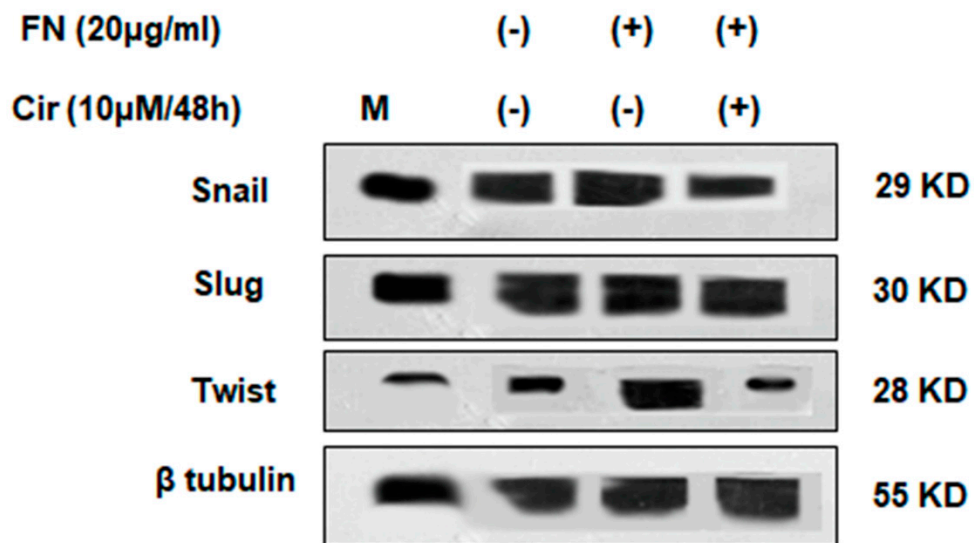

Figure S2. Scanned blots of Figure 5.

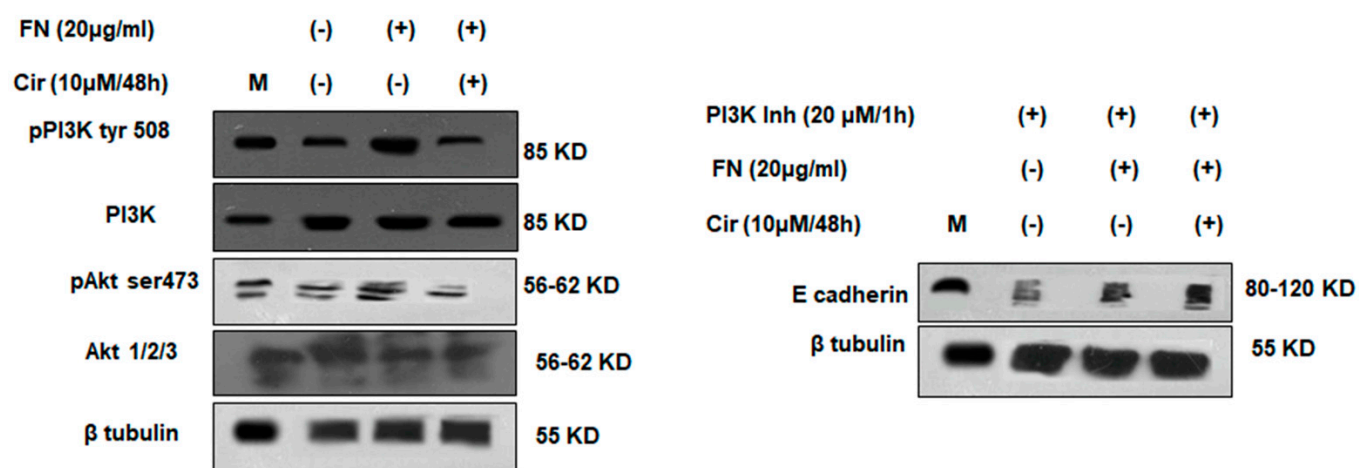

Figure S3. Scanned blots of Figure 6.

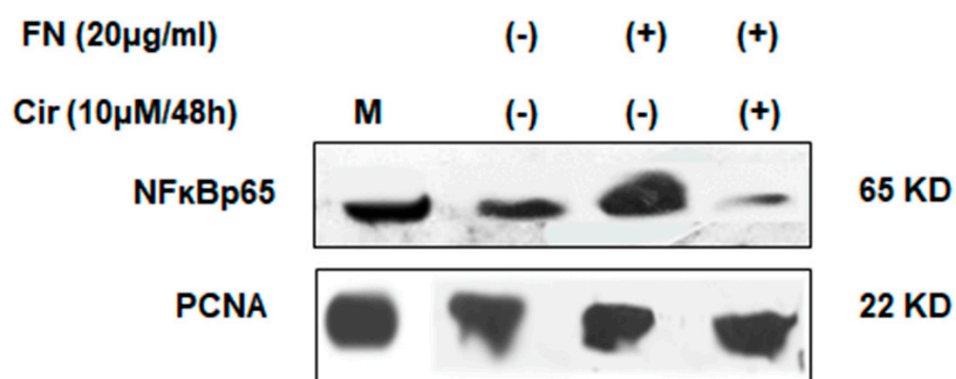

Figure S4. Scanned blots of Figure 7.
